# Supplementary material
Source: PubMed Central journal article supplement (PMC5967390)
Supplement: NIHMS967815-supplement-sup2.pdf [file NIHMS967815-supplement-sup2.pdf]

|     |     |     |     |
|-----|-----|-----|-----|
| 1   | ... | ... | ... |
| 2   | ... | ... | ... |
| 3   | ... | ... | ... |
| 4   | ... | ... | ... |
| 5   | ... | ... | ... |
| 6   | ... | ... | ... |
| 7   | ... | ... | ... |
| 8   | ... | ... | ... |
| 9   | ... | ... | ... |
| 10  | ... | ... | ... |
| 11  | ... | ... | ... |
| 12  | ... | ... | ... |
| 13  | ... | ... | ... |
| 14  | ... | ... | ... |
| 15  | ... | ... | ... |
| 16  | ... | ... | ... |
| 17  | ... | ... | ... |
| 18  | ... | ... | ... |
| 19  | ... | ... | ... |
| 20  | ... | ... | ... |
| 21  | ... | ... | ... |
| 22  | ... | ... | ... |
| 23  | ... | ... | ... |
| 24  | ... | ... | ... |
| 25  | ... | ... | ... |
| 26  | ... | ... | ... |
| 27  | ... | ... | ... |
| 28  | ... | ... | ... |
| 29  | ... | ... | ... |
| 30  | ... | ... | ... |
| 31  | ... | ... | ... |
| 32  | ... | ... | ... |
| 33  | ... | ... | ... |
| 34  | ... | ... | ... |
| 35  | ... | ... | ... |
| 36  | ... | ... | ... |
| 37  | ... | ... | ... |
| 38  | ... | ... | ... |
| 39  | ... | ... | ... |
| 40  | ... | ... | ... |
| 41  | ... | ... | ... |
| 42  | ... | ... | ... |
| 43  | ... | ... | ... |
| 44  | ... | ... | ... |
| 45  | ... | ... | ... |
| 46  | ... | ... | ... |
| 47  | ... | ... | ... |
| 48  | ... | ... | ... |
| 49  | ... | ... | ... |
| 50  | ... | ... | ... |
| 51  | ... | ... | ... |
| 52  | ... | ... | ... |
| 53  | ... | ... | ... |
| 54  | ... | ... | ... |
| 55  | ... | ... | ... |
| 56  | ... | ... | ... |
| 57  | ... | ... | ... |
| 58  | ... | ... | ... |
| 59  | ... | ... | ... |
| 60  | ... | ... | ... |
| 61  | ... | ... | ... |
| 62  | ... | ... | ... |
| 63  | ... | ... | ... |
| 64  | ... | ... | ... |
| 65  | ... | ... | ... |
| 66  | ... | ... | ... |
| 67  | ... | ... | ... |
| 68  | ... | ... | ... |
| 69  | ... | ... | ... |
| 70  | ... | ... | ... |
| 71  | ... | ... | ... |
| 72  | ... | ... | ... |
| 73  | ... | ... | ... |
| 74  | ... | ... | ... |
| 75  | ... | ... | ... |
| 76  | ... | ... | ... |
| 77  | ... | ... | ... |
| 78  | ... | ... | ... |
| 79  | ... | ... | ... |
| 80  | ... | ... | ... |
| 81  | ... | ... | ... |
| 82  | ... | ... | ... |
| 83  | ... | ... | ... |
| 84  | ... | ... | ... |
| 85  | ... | ... | ... |
| 86  | ... | ... | ... |
| 87  | ... | ... | ... |
| 88  | ... | ... | ... |
| 89  | ... | ... | ... |
| 90  | ... | ... | ... |
| 91  | ... | ... | ... |
| 92  | ... | ... | ... |
| 93  | ... | ... | ... |
| 94  | ... | ... | ... |
| 95  | ... | ... | ... |
| 96  | ... | ... | ... |
| 97  | ... | ... | ... |
| 98  | ... | ... | ... |
| 99  | ... | ... | ... |
| 100 | ... | ... | ... |
