# Supplementary material
Source: PubMed Central journal article supplement (PMC5967390)
Supplement: NIHMS967815-supplement-sup2a.pdf [file NIHMS967815-supplement-sup2a.pdf]

| ID  | Variable                                         | KS Statistics | Mean Subnetwork2 - KS BH adjusted |             |
|-----|--------------------------------------------------|---------------|-----------------------------------|-------------|
|     |                                                  |               | Mean Subnetwork1                  | p-value     |
| 239 | compMRI_unloadedT2_cartilage.LF                  | 0.65          | 4.592                             | 1.45683E-08 |
| 240 | compMRI_unloadedT2_cartilage.cLFa                | 0.69          | 4.359                             | 1.45683E-08 |
| 242 | compMRI_unloadedT2_cartilage.cLFp                | 0.67          | 5.384                             | 1.45683E-08 |
| 245 | compMRI_unloadedT2_cartilage.cMFa                | 0.66          | 3.246                             | 2.50019E-08 |
| 244 | compMRI_unloadedT2_cartilage.MF                  | 0.64          | 3.728                             | 2.50019E-08 |
| 146 | compMRI_loadedT2_cartilage.cLFp                  | 0.58          | 3.592                             | 1.556E-07   |
| 259 | compMRI_unloadedT2_cartilage.boneLF              | 0.59          | 5.315                             | 2.51674E-07 |
| 241 | compMRI_unloadedT2_cartilage.cLFe                | 0.61          | 5.492                             | 2.51674E-07 |
| 268 | compMRI_unloadedT2_cartilage.articularMT         | 0.56          | 4.355                             | 2.51674E-07 |
| 247 | compMRI_unloadedT2_cartilage.cMFp                | 0.61          | 4.577                             | 3.29133E-07 |
| 243 | compMRI_unloadedT2_cartilage.pLF                 | 0.60          | 3.851                             | 3.83121E-07 |
| 155 | compMRI_loadedT2_cartilage.cLTe                  | 0.55          | 3.980                             | 7.30216E-07 |
| 249 | compMRI_unloadedT2_cartilage.LT                  | 0.53          | 4.221                             | 1.08931E-06 |
| 267 | compMRI_unloadedT2_cartilage.articularLT         | 0.53          | 4.869                             | 1.44374E-06 |
| 253 | compMRI_unloadedT2_cartilage.MT                  | 0.53          | 3.680                             | 1.44374E-06 |
| 258 | compMRI_unloadedT2_cartilage.P                   | 0.55          | 3.115                             | 1.44374E-06 |
| 257 | compMRI_unloadedT2_cartilage.FrT                 | 0.53          | 3.857                             | 2.68929E-06 |
| 246 | compMRI_unloadedT2_cartilage.cMFc                | 0.56          | 5.076                             | 3.19542E-06 |
| 271 | compMRI_unloadedR2-R1p_cartilage.LF              | 0.55          | -0.005                            | 3.19542E-06 |
| 265 | compMRI_unloadedT2_cartilage.articularLF         | 0.53          | 3.883                             | 3.22379E-06 |
| 171 | compMRI_loadedT2_cartilage.articularLT           | 0.52          | 3.554                             | 3.44033E-06 |
| 264 | compMRI_unloadedT2_cartilage.boneP               | 0.51          | 3.862                             | 4.60917E-06 |
| 207 | compMRI_unloadedT1p_cartilage.LF                 | 0.53          | 3.179                             | 4.93226E-06 |
| 263 | compMRI_unloadedT2_cartilage.boneFrT             | 0.52          | 2.936                             | 5.28587E-06 |
| 251 | compMRI_unloadedT2_cartilage.cLTe                | 0.54          | 4.067                             | 8.82171E-06 |
| 150 | compMRI_loadedT2_cartilage.cMFc                  | 0.50          | 3.292                             | 8.82171E-06 |
| 143 | compMRI_loadedT2_cartilage.LF                    | 0.50          | 2.593                             | 9.11256E-06 |
| 248 | compMRI_unloadedT2_cartilage.pMF                 | 0.53          | 2.597                             | 9.11256E-06 |
| 221 | compMRI_unloadedT1p_cartilage.MT                 | 0.49          | 3.202                             | 1.05465E-05 |
| 272 | compMRI_unloadedR2-R1p_cartilage.cLFa            | 0.54          | -0.004                            | 1.13599E-05 |
| 144 | compMRI_loadedT2_cartilage.cLFa                  | 0.49          | 2.580                             | 1.22448E-05 |
| 208 | compMRI_unloadedT1p_cartilage.cLFa               | 0.52          | 3.549                             | 1.46986E-05 |
| 250 | compMRI_unloadedT2_cartilage.cLTa                | 0.52          | 3.667                             | 1.58566E-05 |
| 151 | compMRI_loadedT2_cartilage.cMFp                  | 0.48          | 3.279                             | 1.90246E-05 |
| 169 | compMRI_loadedT2_cartilage.articularLF           | 0.48          | 2.897                             | 1.90246E-05 |
| 269 | compMRI_unloadedT2_cartilage.articularFrT        | 0.48          | 3.816                             | 1.90246E-05 |
| 159 | compMRI_loadedT2_cartilage.cMTc                  | 0.48          | 2.759                             | 1.90246E-05 |
| 145 | compMRI_loadedT2_cartilage.cLFe                  | 0.48          | 3.261                             | 1.90246E-05 |
| 147 | compMRI_loadedT2_cartilage.pLF                   | 0.48          | 2.380                             | 1.90246E-05 |
| 222 | compMRI_unloadedT1p_cartilage.cMTa               | 0.51          | 3.512                             | 1.90246E-05 |
| 260 | compMRI_unloadedT2_cartilage.boneMF              | 0.49          | 4.011                             | 2.16178E-05 |
| 261 | compMRI_unloadedT2_cartilage.boneLT              | 0.47          | 3.713                             | 2.34207E-05 |
| 252 | compMRI_unloadedT2_cartilage.cLTp                | 0.51          | 3.719                             | 2.81428E-05 |
| 256 | compMRI_unloadedT2_cartilage.cMTp                | 0.51          | 3.379                             | 2.81428E-05 |
| 224 | compMRI_unloadedT1p_cartilage.cMTp               | 0.50          | 3.293                             | 3.30304E-05 |
| 232 | compMRI_unloadedT1p_cartilage.boneP              | 0.46          | 4.288                             | 3.57893E-05 |
| 236 | compMRI_unloadedT1p_cartilage.articular.MT       | 0.46          | 3.998                             | 3.87815E-05 |
| 148 | compMRI_loadedT2_cartilage.MF                    | 0.46          | 2.230                             | 4.20261E-05 |
| 266 | compMRI_unloadedT2_cartilage.articularMF         | 0.48          | 3.693                             | 4.55436E-05 |
| 215 | compMRI_unloadedT1p_cartilage.cMFp               | 0.48          | 4.171                             | 6.02841E-05 |
| 254 | compMRI_unloadedT2_cartilage.cMTa                | 0.48          | 3.198                             | 6.52787E-05 |
| 235 | compMRI_unloadedT1p_cartilage.articular.LT       | 0.44          | 4.003                             | 7.80108E-05 |
| 274 | compMRI_unloadedR2-R1p_cartilage.cLFp            | 0.49          | -0.006                            | 7.80108E-05 |
| 270 | compMRI_unloadedT2_cartilage.articularP          | 0.45          | 3.264                             | 0.000100736 |
| 154 | compMRI_loadedT2_cartilage.cLTa                  | 0.44          | 3.239                             | 0.000100736 |
| 226 | compMRI_unloadedT1p_cartilage.P                  | 0.45          | 3.377                             | 0.000107033 |
| 227 | compMRI_unloadedT1p_cartilage.bone.LF            | 0.46          | 3.765                             | 0.00011582  |
| 209 | compMRI_unloadedT1p_cartilage.cLFe               | 0.46          | 4.642                             | 0.000137916 |
| 214 | compMRI_unloadedT1p_cartilage.cMFc               | 0.46          | 4.833                             | 0.000137916 |
| 149 | compMRI_loadedT2_cartilage.cMFa                  | 0.43          | 2.260                             | 0.000137916 |
| 213 | compMRI_unloadedT1p_cartilage.cMFa               | 0.46          | 2.854                             | 0.000137916 |
| 210 | compMRI_unloadedT1p_cartilage.cLFp               | 0.46          | 3.689                             | 0.00014933  |
| 153 | compMRI_loadedT2_cartilage.LT                    | 0.43          | 3.213                             | 0.000185519 |
| 291 | compMRI_unloadedR2-R1p_cartilage.boneLF          | 0.45          | -0.007                            | 0.000185519 |
| 292 | compMRI_unloadedR2-R1p_cartilage.boneMF          | 0.45          | -0.004                            | 0.000197493 |
| 161 | compMRI_loadedT2_cartilage.FrT                   | 0.41          | 1.034                             | 0.000234355 |
| 219 | compMRI_unloadedT1p_cartilage.cLTe               | 0.45          | 4.333                             | 0.000253255 |
| 156 | compMRI_loadedT2_cartilage.cLTp                  | 0.42          | 3.090                             | 0.00029994  |
| 217 | compMRI_unloadedT1p_cartilage.LT                 | 0.43          | 2.631                             | 0.00029994  |
| 121 | compMRI_loadedT1p_cartilage.LT                   | 0.41          | 2.493                             | 0.000349672 |
| 273 | compMRI_unloadedR2-R1p_cartilage.cLFe            | 0.45          | -0.007                            | 0.00037744  |
| 119 | compMRI_loadedT1p_cartilage.cMFp                 | 0.40          | 3.799                             | 0.00037744  |
| 262 | compMRI_unloadedT2_cartilage.boneMT              | 0.40          | 3.828                             | 0.000480598 |
| 187 | compMRI_unloadedR2-R1p_cartilage.cLTe            | 0.43          | -0.006                            | 0.000480598 |
| 165 | compMRI_loadedT2_cartilage.boneLT                | 0.40          | 2.981                             | 0.000511324 |
| 212 | compMRI_unloadedT1p_cartilage.MF                 | 0.42          | 2.589                             | 0.000511324 |
| 237 | compMRI_unloadedT1p_cartilage.articularFrT       | 0.41          | 3.269                             | 0.00059436  |
| 118 | compMRI_loadedT1p_cartilage.cMFc                 | 0.39          | 3.992                             | 0.000699092 |
| 218 | compMRI_unloadedT1p_cartilage.cLTa               | 0.42          | 3.805                             | 0.000752983 |
| 158 | compMRI_loadedT2_cartilage.cMTa                  | 0.39          | 2.352                             | 0.000752983 |
| 123 | compMRI_loadedT1p_cartilage.cLTe                 | 0.39          | 3.373                             | 0.000800825 |
| 117 | compMRI_loadedT1p_cartilage.cMFa                 | 0.39          | 2.369                             | 0.000800825 |
| 116 | compMRI_loadedT1p_cartilage.MF                   | 0.39          | 2.265                             | 0.000800825 |
| 163 | compMRI_loadedT2_cartilage.boneLF                | 0.39          | 2.518                             | 0.000841743 |
| 122 | compMRI_loadedT1p_cartilage.cLTa                 | 0.39          | 2.551                             | 0.000841743 |
| 225 | compMRI_unloadedT1p_cartilage.FrT                | 0.40          | 2.637                             | 0.000975689 |
| 238 | compMRI_unloadedT1p_cartilage.articularP         | 0.39          | 3.647                             | 0.001050039 |
| 172 | compMRI_loadedT2_cartilage.articularMT           | 0.38          | 2.870                             | 0.001129753 |
| 275 | compMRI_unloadedR2-R1p_cartilage.pLF             | 0.42          | -0.004                            | 0.001129753 |
| 157 | compMRI_loadedT2_cartilage.MT                    | 0.38          | 2.442                             | 0.001201687 |
| 170 | compMRI_loadedT2_cartilage.articularMF           | 0.38          | 2.816                             | 0.001292368 |
| 255 | compMRI_unloadedT2_cartilage.cMTc                | 0.40          | 3.074                             | 0.001639756 |
| 211 | compMRI_unloadedT1p_cartilage.pLF                | 0.40          | 2.779                             | 0.00191121  |
| 133 | compMRI_loadedT1p_cartilage.boneLT               | 0.36          | 3.105                             | 0.002410999 |
| 136 | compMRI_loadedT1p_cartilage.boneP                | 0.34          | 2.718                             | 0.002584828 |
| 299 | compMRI_unloadedR2-R1p_cartilage.articularLT     | 0.37          | -0.004                            | 0.002770389 |
| 297 | compMRI_unloadedR2-R1p_cartilage.articularLF     | 0.38          | -0.003                            | 0.002968405 |
| 279 | compMRI_unloadedR2-R1p_cartilage.cMFp            | 0.39          | -0.004                            | 0.003179641 |
| 108 | biomechanics_peakInternalRotationAngle_hip       | 0.42          | -2.923                            | 0.003179641 |
| 223 | compMRI_unloadedT1p_cartilage.cMTc               | 0.38          | 3.272                             | 0.003370852 |
| 124 | compMRI_loadedT1p_cartilage.cLTp                 | 0.35          | 2.360                             | 0.003370852 |
| 360 | compMRI_diff(loaded,unloaded)T2_cartilage.boneP  | 0.38          | -1.758                            | 0.003370852 |
| 127 | compMRI_loadedT1p_cartilage.cMTc                 | 0.35          | 2.114                             | 0.003538868 |
| 281 | compMRI_unloadedR2-R1p_cartilage.LT              | 0.38          | -0.007                            | 0.003788404 |
| 234 | compMRI_unloadedT1p_cartilage.articularMF        | 0.37          | 3.051                             | 0.004378803 |
| 277 | compMRI_unloadedR2-R1p_cartilage.cMFa            | 0.38          | -0.003                            | 0.005053579 |
| 276 | compMRI_unloadedR2-R1p_cartilage.MF              | 0.37          | -0.002                            | 0.005053579 |
| 233 | compMRI_unloadedT1p_cartilage.articularLF        | 0.36          | 2.882                             | 0.005350578 |
| 278 | compMRI_unloadedR2-R1p_cartilage.cMFc            | 0.38          | -0.005                            | 0.005350578 |
| 129 | compMRI_loadedT1p_cartilage.FrT                  | 0.33          | 2.282                             | 0.005350578 |
| 188 | compMRI_loadedR2-R1p_cartilage.cLTp              | 0.36          | -0.004                            | 0.006050891 |
| 229 | compMRI_unloadedT1p_cartilage.boneLT             | 0.33          | 3.006                             | 0.006461341 |
| 185 | compMRI_loadedR2-R1p_cartilage.LT                | 0.35          | -0.004                            | 0.007425708 |
| 109 | biomechanics_peakInternalRotationAngle_hip.first | 0.39          | -2.985                            | 0.007921157 |
| 338 | compMRI_diff(loaded,unloaded)T2_cartilage.cLFp   | 0.38          | -2.143                            | 0.007921157 |
| 228 | compMRI_unloadedT1p_cartilage.boneMF             | 0.35          | 2.253                             | 0.008374117 |
| 220 | compMRI_unloadedT1p_cartilage.cLTp               | 0.35          | 3.588                             | 0.008927727 |
| 139 | compMRI_loadedT1p_cartilage.articularLT          | 0.32          | 1.746                             | 0.008927727 |
| 160 | compMRI_loadedT2_cartilage.cMTp                  | 0.33          | 2.584                             | 0.009434869 |
| 186 | compMRI_loadedR2-R1p_cartilage.cLTa              | 0.34          | -0.004                            | 0.011591175 |
| 126 | compMRI_loadedT1p_cartilage.cMTa                 | 0.32          | 1.803                             | 0.012336289 |
| 138 | compMRI_loadedT1p_cartilage.articularMF          | 0.31          | 1.776                             | 0.013124947 |
| 340 | compMRI_diff(loaded,unloaded)T2_cartilage.MF     | 0.37          | -0.752                            | 0.013124947 |
| 162 | compMRI_loadedT2_cartilage.P                     | 0.31          | 1.690                             | 0.014841899 |
| 216 | compMRI_unloadedT1p_cartilage.pMF                | 0.34          | 2.088                             | 0.014841899 |
| 177 | compMRI_unloadedR2-R1p_cartilage.cLFe            | 0.33          | -0.003                            | 0.014841899 |
| 353 | compMRI_diff(loaded,unloaded)T2_cartilage.FrT    | 0.33          | -1.424                            | 0.016629009 |
| 113 | compMRI_loadedT1p_cartilage.cLFe                 | 0.30          | 3.334                             | 0.018902714 |
| 284 | compMRI_unloadedR2-R1p_cartilage.cLTp            | 0.34          | -0.004                            | 0.02128923  |
| 174 | compMRI_loadedT2_cartilage.articularP            | 0.29          | 2.208                             | 0.022581667 |
| 341 | compMRI_diff(loaded,unloaded)T2_cartilage.cMFa   | 0.35          | -0.595                            | 0.022581667 |
| 231 | compMRI_unloadedT1p_cartilage.boneFrT            | 0.31          | 1.967                             | 0.023764351 |
| 166 | compMRI_loadedT2_cartilage.boneMT                | 0.30          | 2.191                             | 0.023764351 |
| 11  | Xray_mecAxis                                     | 0.28          | 1.117                             | 0.023764351 |
| 178 | compMRI_unloadedR2-R1p_cartilage.cLFp            | 0.31          | -0.003                            | 0.02482077  |
| 230 | compMRI_unloadedT1p_cartilage.boneMT             | 0.29          | 2.557                             | 0.034033816 |
| 175 | compMRI_loadedR2-R1p_cartilage.LF                | 0.30          | -0.002                            | 0.034033816 |
| 280 | compMRI_unloadedR2-R1p_cartilage.pMF             | 0.32          | -0.002                            | 0.03573968  |
| 203 | compMRI_unloadedR2-R1p_cartilage.articularLT     | 0.30          | -0.004                            | 0.037791832 |
| 112 | compMRI_loadedT1p_cartilage.cLFa                 | 0.28          | 2.135                             | 0.039947874 |
| 135 | compMRI_loadedT1p_cartilage.boneFrT              | 0.27          | 1.866                             | 0.039947874 |
| 132 | compMRI_loadedT1p_cartilage.boneMF               | 0.28          | 2.711                             | 0.044589148 |
| 176 | compMRI_loadedR2-R1p_cartilage.cLFe              | 0.29          | -0.002                            | 0.044589148 |
| 282 | compMRI_unloadedR2-R1p_cartilage.cLTa            | 0.31          | -0.004                            | 0.046438478 |
| 283 | compMRI_unloadedR2-R1p_cartilage.cLTe            | 0.31          | -0.005                            | 0.046438478 |
| 168 | compMRI_loadedT2_cartilage.boneP                 | 0.27          | 1.763                             | 0.048692381 |
| 114 | compMRI_loadedT1p_cartilage.cLFp                 | 0.27          | 2.425                             | 0.048692381 |
| 137 | compMRI_loadedT1p_cartilage.articularLF          | 0.27          | 1.885                             | 0.048692381 |
| 356 | compMRI_diff(loaded,unloaded)T2_cartilage.boneMF | 0.31          | -1.676                            | 0.048692381 |
